# Supplementary material
Source: PubMed Central journal article supplement (PMC3662546)
Supplement: NIHMS416577-supplement-Figure_1.pdf [file NIHMS416577-supplement-Figure_1.pdf]

**Supplemental Figure 1.**

**GENERAL VOTING INSTRUCTIONS:** For the following voting blocks, each section describes a type of patient then specific statements follow that you are being asked to rate the appropriateness of that statement on a 1 to 9 Likert scale where 1 is Inappropriate and 9 is Most Appropriate.

**FOR THE FOLLOWING VOTING SCENARIOS, THE QUESTIONS RELATE TO INITIAL ACUTE GOUT THERAPY DECISIONS:**

|                                                                                                                                                                                             |        | Vote Frequency |       |       |
|---------------------------------------------------------------------------------------------------------------------------------------------------------------------------------------------|--------|----------------|-------|-------|
|                                                                                                                                                                                             | MEDIAN | (1-3)          | (4-6) | (7-9) |
| <b>General Principles</b>                                                                                                                                                                   |        |                |       |       |
| Treatment of acute gout should be initiated within the first 24 hours after symptom onset                                                                                                   | 9      | 0              | 0     | 11    |
| Once a diagnosis of gout has been established, patients should be provided instruction so that they can initiate treatment upon signs of an attack without need to consult their physician. | 9      | 0              | 0     | 11    |
| <b>Complementary therapies</b>                                                                                                                                                              |        |                |       |       |
| Topical ice applied to affected joint (with no pharmacologic therapy)                                                                                                                       | 1      | 10             | 1     | 0     |
| Topical ice applied to affected joint (in combination with pharmacologic therapy)                                                                                                           | 8      | 0              | 1     | 9     |
